# Supplementary material
Source: PubMed Central journal article supplement (PMC3182345)

**a**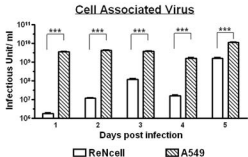**b**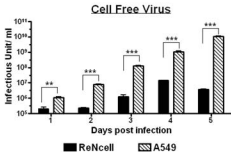

Supplement: mt2011100x1.pdf [file mt2011100x1.pdf]

**A**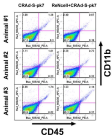**B**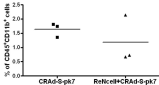

Supplement: mt2011100x2.pdf [file mt2011100x2.pdf]

**a**

48 hours post loading

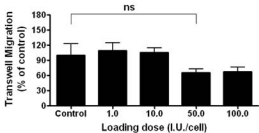**b**

72 hours post loading

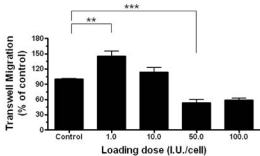

Supplement: mt2011100x3.pdf [file mt2011100x3.pdf]
